# Supplementary material for: Synergistic effects of arginine–glycine–aspartic acid and phosphatidylserine on the surface immunomodulation and osseointegration of titanium implants
Source: Royal Society of Chemistry journal article supplement (doi:10.1039/d2bm01589g), 2022-12-22
Supplement: d2bm01589g1.pdf [file d2bm01589g1.pdf]

**Supplementary Information for**

**Synergistic effects of arginine-glycine-aspartic acid and phosphatidylserine on the surface immunomodulation and osseointegration of titanium implants**

Lele Wu, Gyeong Mi Seon, Sungwon Ju, Sang Hoon Choi, En-Shi Jiang, Yongjoon Kim, Shin Hye Chung, Jin-Soo Ahn, Hyeong-Cheol Yang\*

**Supplementary materials**

**Table S1. RT-qPCR primers**

| <b>Gene</b>   | <b>Forward</b>                     | <b>Reverse</b>                     |
|---------------|------------------------------------|------------------------------------|
| Arg-1         | CTCCAAGCCAAAGTCCTTAGAG             | AGGAGCTGTCATTAGGGACATC             |
| FIZZ1         | GGTCCCAGTGCATATGGATGAGACCAT<br>AGA | CACCTCTTCACTCGAGGGACAGTTGGC<br>AGC |
| GAPDH         | TGTGTCCGTCGTGGATCTGA               | CCTGCTTCACCACCTTCTTGAT             |
| IL-1 $\beta$  | TGGAGAGTGTGGATCCCAAG               | GGTGCTGATGTACCAGTTGG               |
| TNF- $\alpha$ | GGCAGGTCTACTTTGGAGTCATTGC          | ACATTCGAGCCAGTGAATTCGG             |
| iNOS          | CGAAACGCTTCATTCCAA                 | TGAGCCTATATTGCTGTGGCT              |
| YM-1          | CAGGGTAATGAGTGGGTTGG               | CACGGCACCTCCTAAATTGT               |

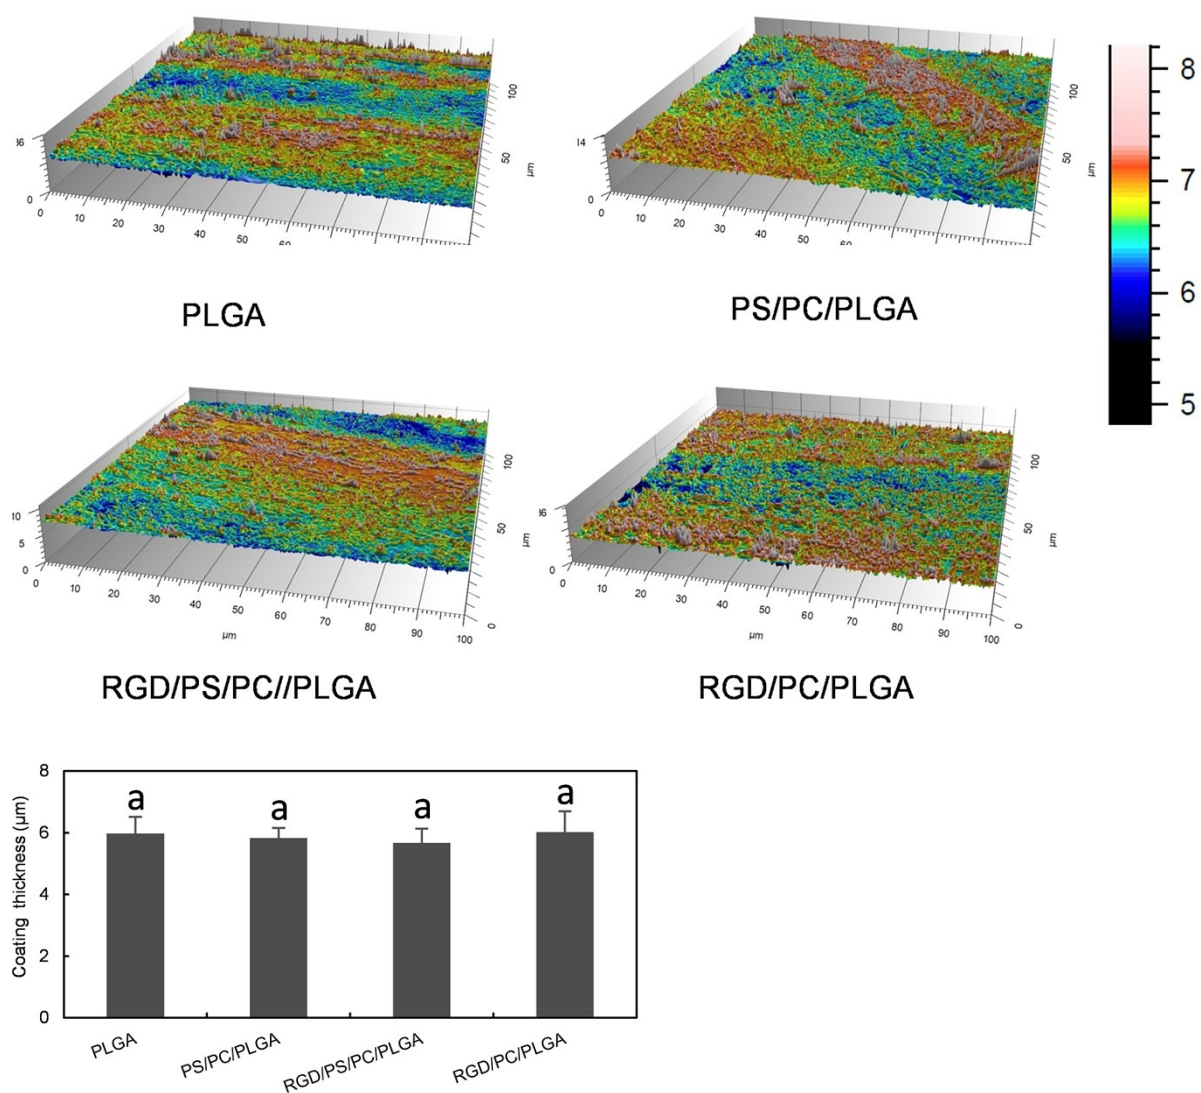

**Fig. S1. The thickness of the PLGA coatings.** The thickness of the PLGA coatings was measured using laser scanning confocal microscopy. Data from 3 independent experiments are presented as means  $\pm$  SD. No statistical differences were observed among the groups ( $p > 0.05$ ).

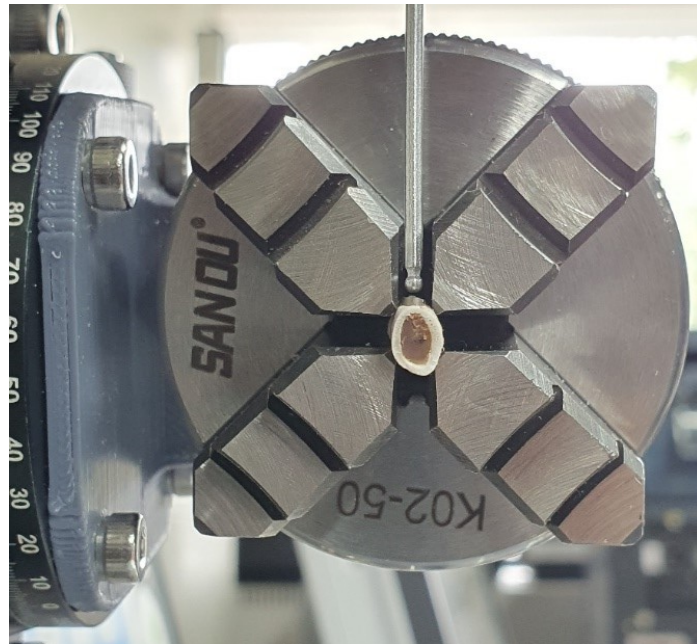

**Fig. S2. Biomechanical push-out test.** A holder and intender for the push-out test. The implant was pushed out of the bone at a moving speed of 1 mm/min, and the maximum pushing force was recorded.

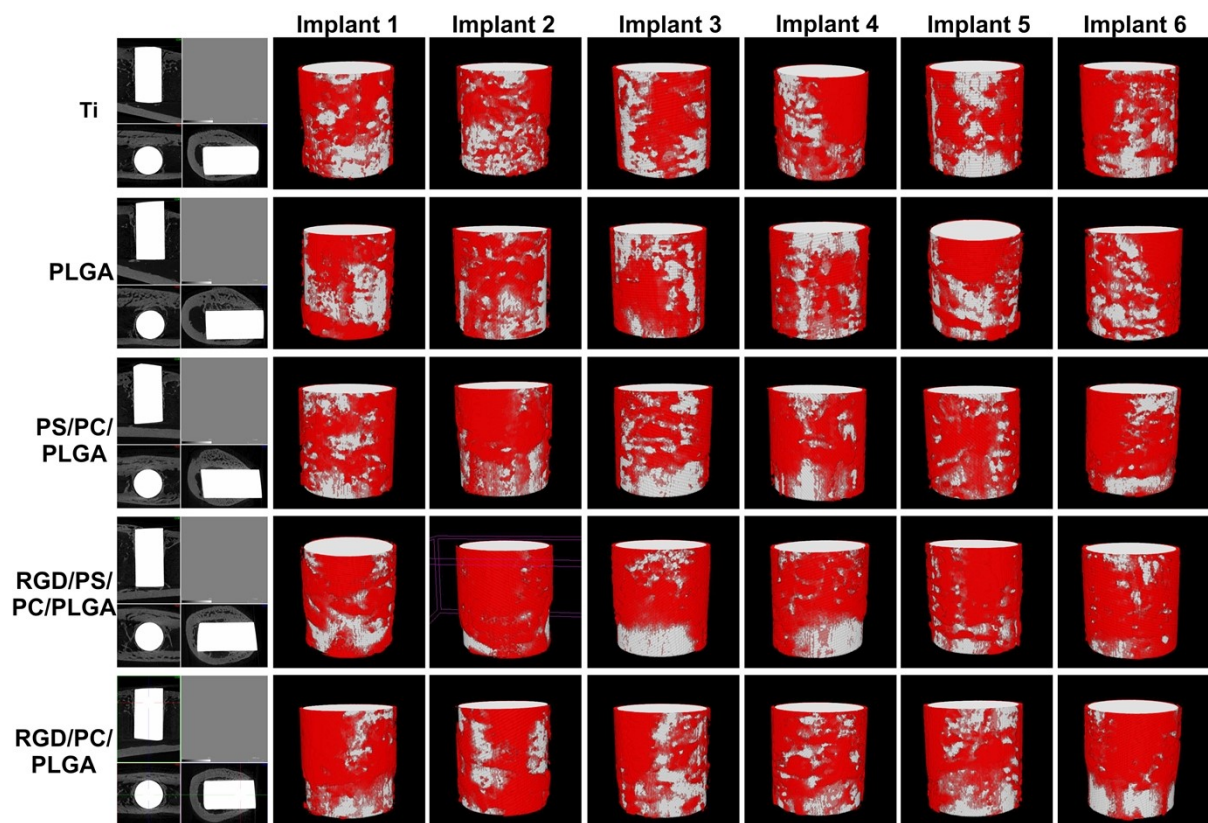

**Fig. S3. Micro-CT analysis of new bone formation around the implants.** Ti rods were implanted for 4 weeks, and the hard tissues around the implants were observed using micro-CT. Top and cross-sectional 2D images of the implant area, and 3D reconstructed images of the implant area (bone: red, implants: gray).
